# Supplementary material for: Prevalence and tracking of back pain from childhood to adolescence
Source: Springer Nature journal article supplement (doi:10.1186/1471-2474-12-98), 2011-05-16
Supplement: 12891_2010_1144_MOESM1_ESM.pdf [file 12891_2010_1144_MOESM1_ESM.pdf]

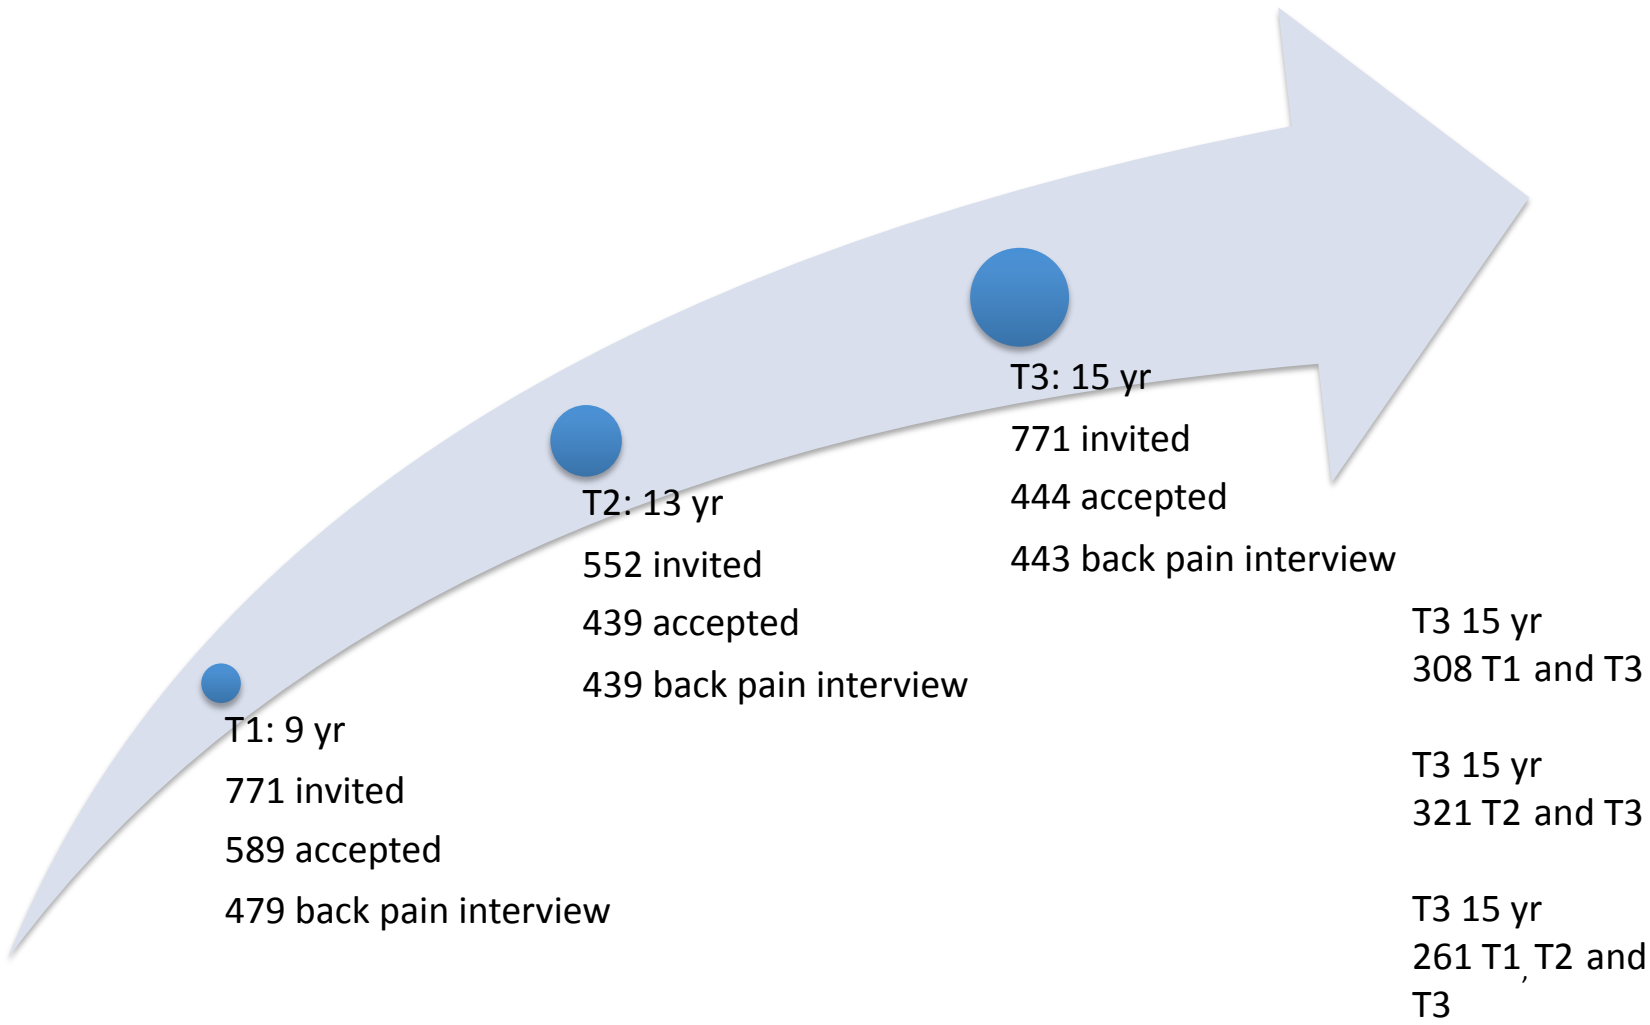

T1: 9 yr

771 invited

589 accepted

479 back pain interview

T2: 13 yr

552 invited

439 accepted

439 back pain interview

T3: 15 yr

771 invited

444 accepted

443 back pain interview

T3 15 yr

308 T1 and T3

T3 15 yr

321 T2 and T3

T3 15 yr

261 T1, T2 and T3
