# Supplementary material for: Prevalence and tracking of back pain from childhood to adolescence
Source: Springer Nature journal article supplement (doi:10.1186/1471-2474-12-98), 2011-05-16

# Low back pain

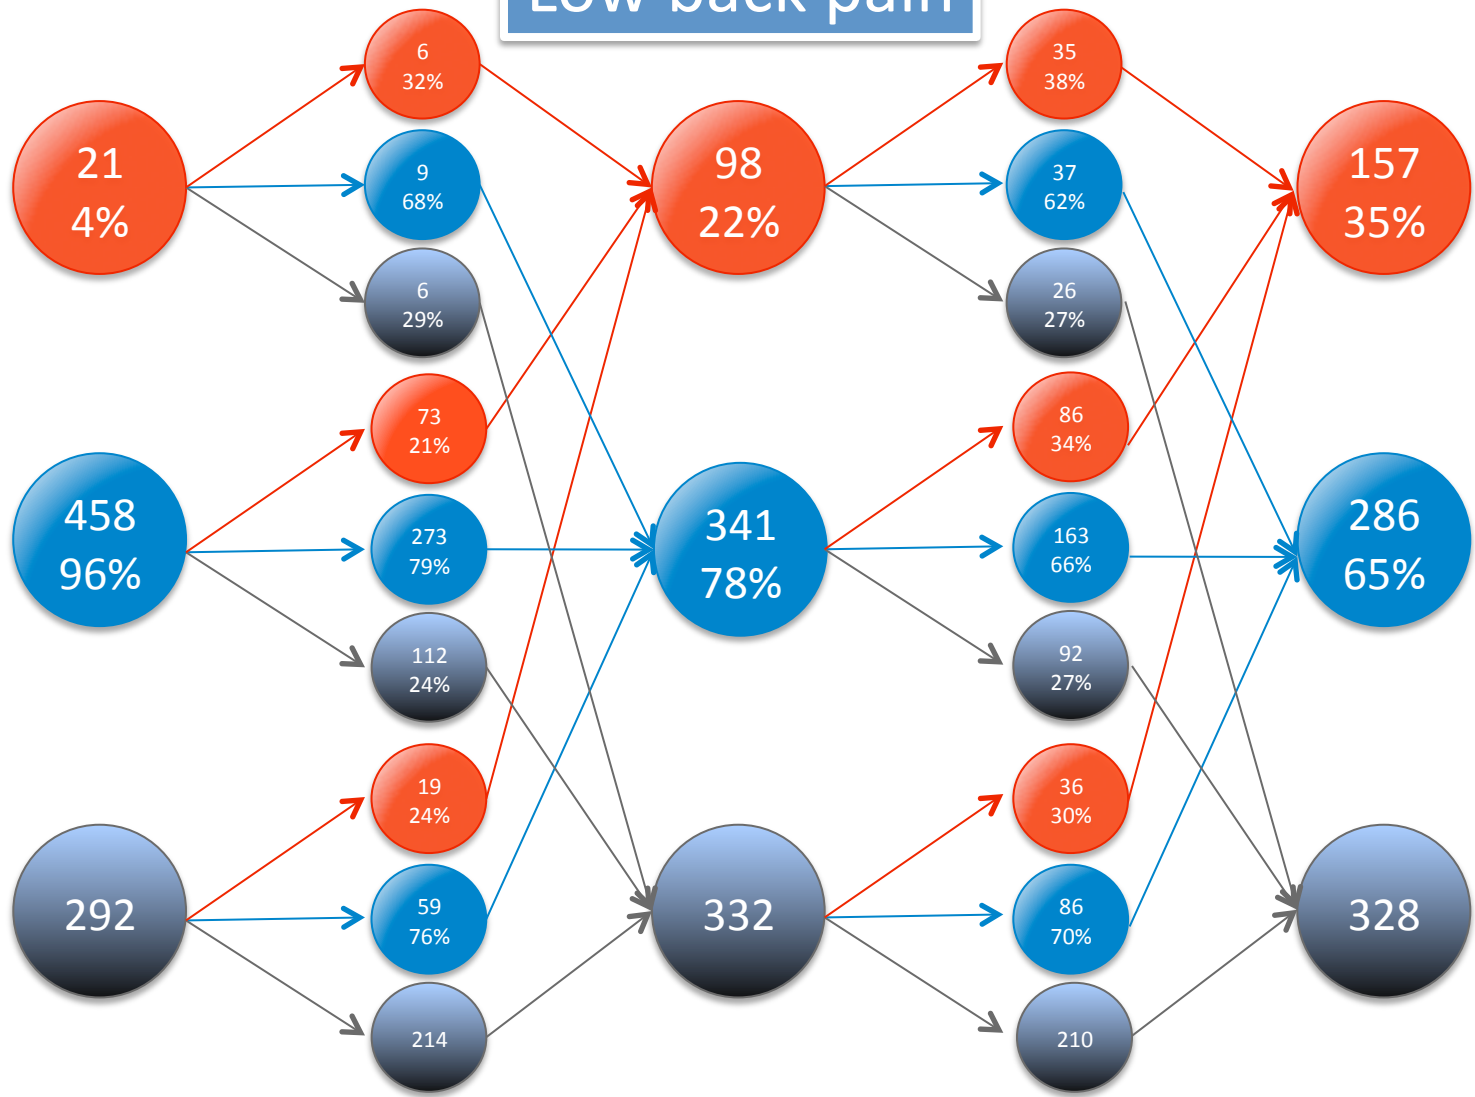

$t_1$  9 yrs  
771 invited  
Back pain interview 479

$t_2$  13 yrs  
552 invited  
Back pain interview 439

$t_3$  15 yrs  
771 invited  
Back pain interview 443

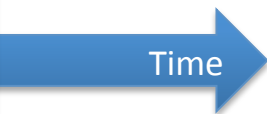

Supplement: 12891_2010_1144_MOESM5_ESM.pdf [file 12891_2010_1144_MOESM5_ESM.pdf]
