# Supplementary material for: Prevalence and tracking of back pain from childhood to adolescence
Source: Springer Nature journal article supplement (doi:10.1186/1471-2474-12-98), 2011-05-16

# Seeking care

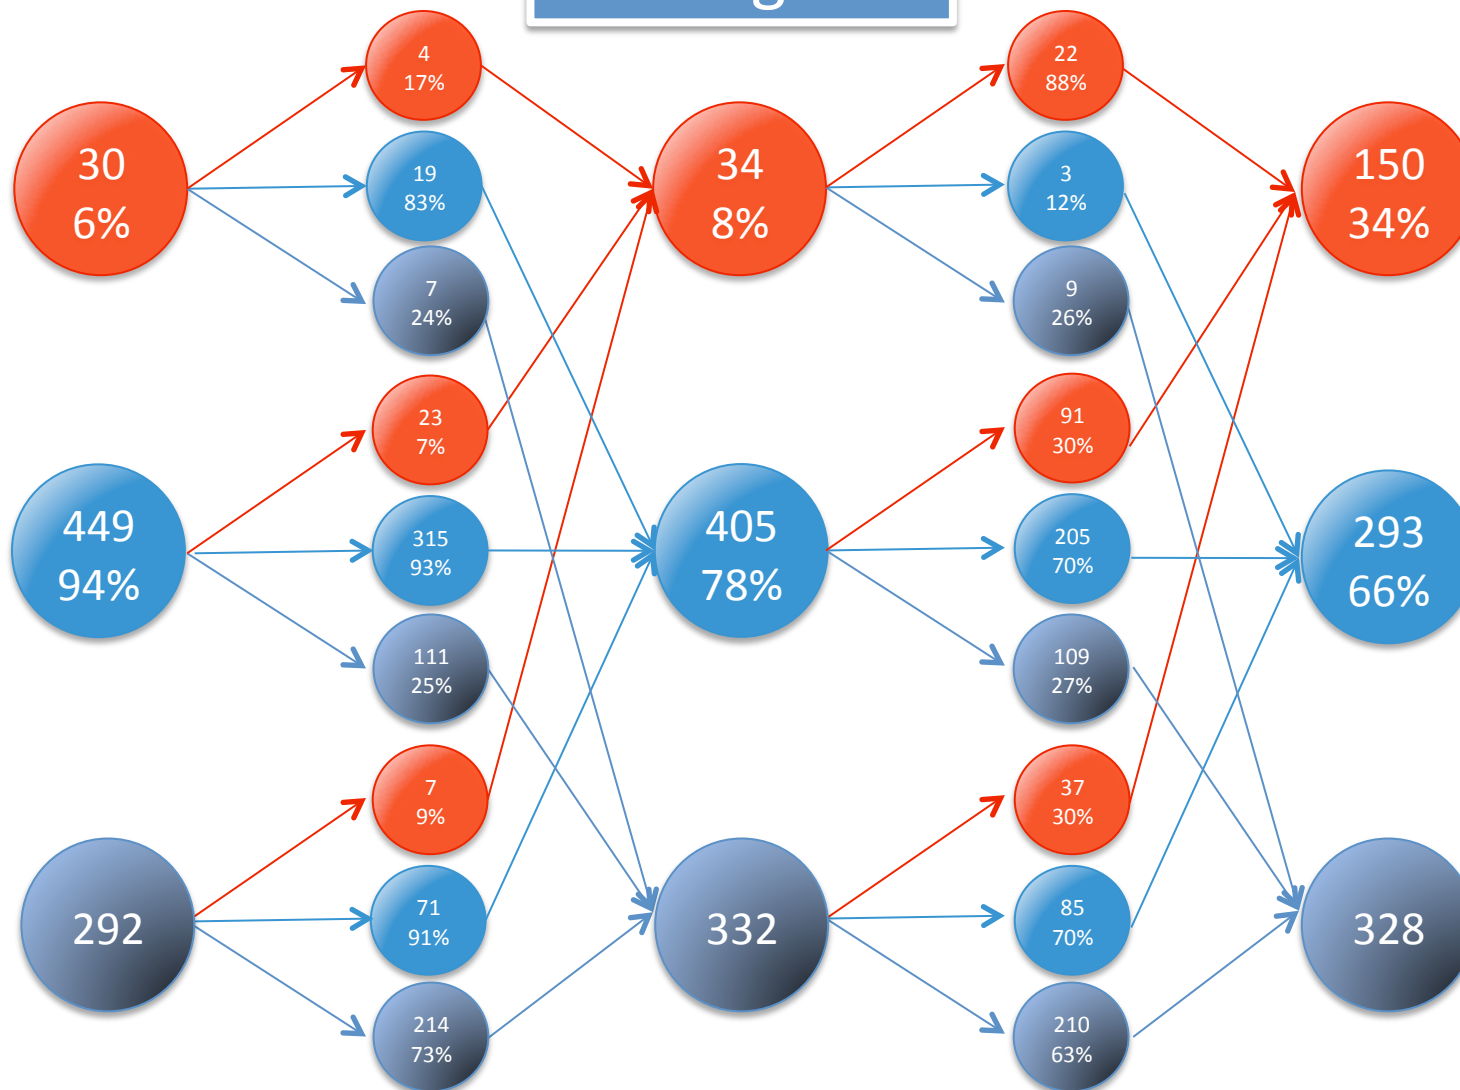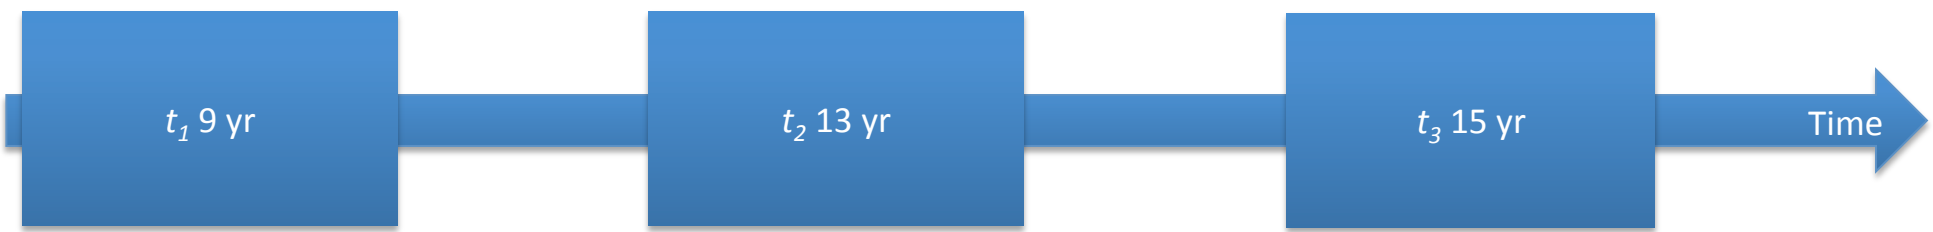

Supplement: 12891_2010_1144_MOESM8_ESM.pdf [file 12891_2010_1144_MOESM8_ESM.pdf]
